# Supplementary material for: State selective electron injection in non-aggregated titanium phthalocyanine sensitised nanocrystalline TiO2films
Source: Royal Society of Chemistry journal article supplement (doi:10.1039/b407860h), 2004-01-01
Supplement: b407860h.doc [file b407860h.doc]

**Supplementary Information.**

**Figure 1s.** Graphical representation for TiPc/TiO2 (a) LUMO and (b) HOMO orbitals determined from semi-empirical calculations using ZINDO/1 in Hyperchem 7.0.

**Figure 2S**. Excitation (em= 775 nm) and emission (ex= 650 nm) spectra of the TiPC dye in dichloromethane measured at room temperature under ambient conditions.

**Figure 3S.** Cyclic Voltametry of **TiPc** dye (concentration 1 x 10-4 M) in nitrogen degassed CH2Cl2 containing 0.1 M tetrabutylammonium hexafluorophosphate salt at a scan rate of 50mV s-1 employing a Pt wire counter electrode and Ag/AgCL reference electrode.

# (4-Carboxycatecholato)-2,(3)-(tetra-tert-butylphthalocyaninato)titanium(IV) (TiPc): 2,(3)-(Tetra-*tert*-butylphthalocyaninato)titanium(IV) oxide**[[1]](#footnote-2)** (30 mg, 0.037 mmol) and 3,4-dihydroxybenzoic acid (14 mg, 0.091 mmol) were dissolved in CHCl3 (3 mL) and heated for 2 h under reflux. After cooling to room temperature, the solvent was removed in vacuo and the crude product washed with methanol. The dark green precipitate was filtered and dried. Yield: 60%. m.p. > 250ºC. 1H NMR (CDCl3): = 1.8-1.9 (br s, 36H, C(C*H*3)3), 4.42 (d, J = 8.6 Hz, 1H, catechol), 5.00 (s, 1H, catechol), 6.23 (d, J = 8.6 Hz, 1H, catechol), 8.3-8.5 (m, 4H, phthalocyanine), 9.3-9.6 ppm (m, 8H, phthalocyanine). MALFI-TOF (TCNQ): *m/z* = 936.5 (M+). IR spectrum (in KBr) of TiPc: 3425 (w), 2962, 2922 (w), 2862 (w), 1715, 1668 (s), 1609, 1458, 1435, 1400, 1366, 1327, 1263, 1146, 1068, 831 cm-1.

Transient optical studies were performed as reported previously [[2]](#footnote-3),[[3]](#footnote-4). Control data on unsensitised films gave negligible transient signals under the experimental conditions employed. Dye sensitised photoelectrochemical solar cells were fabricated as reported before[[4]](#footnote-5), employing a non-scattering TiO2­ film.

1. M. Barthel, D. Dini, S. Vagin, M. Hanack, *Eur. J. Org. Chem.*, 2002, 3756. [↑](#footnote-ref-2)
2. John N. Clifford, E. Palomares, Md. K. Nazeeruddin, M. Gratzel, J. Nelson, X. Li, Nicholas J. Long, James R. Durrant. *J. Am. Chem. Soc*., 2004, 126, 5225. [↑](#footnote-ref-3)
3. N. Hirata, J.-J. Lagref, Emilio J. Palomares, James R. Durrant, M. K. Nazeeruddin, M. Gratzel, D. di Censo., *Chem. Eur. J.,* 2004, 10, 595. [↑](#footnote-ref-4)
4. E. Palomares, John N. Clifford, Saif A. Haque, T. Lutz, James R. Durrant., *J. Am. Chem. Soc*., 2003, 125, 475. [↑](#footnote-ref-5)
